# Supplementary material for: Proto-Oncogene FAM50A Can Regulate the Immune Microenvironment and Development of Hepatocellular Carcinoma In Vitro and In Vivo
Source: MDPI journal article supplement (doi:10.3390/ijms24043217), 2023-02-06
Supplement: s1 [file s1]

# Supplementary Materials

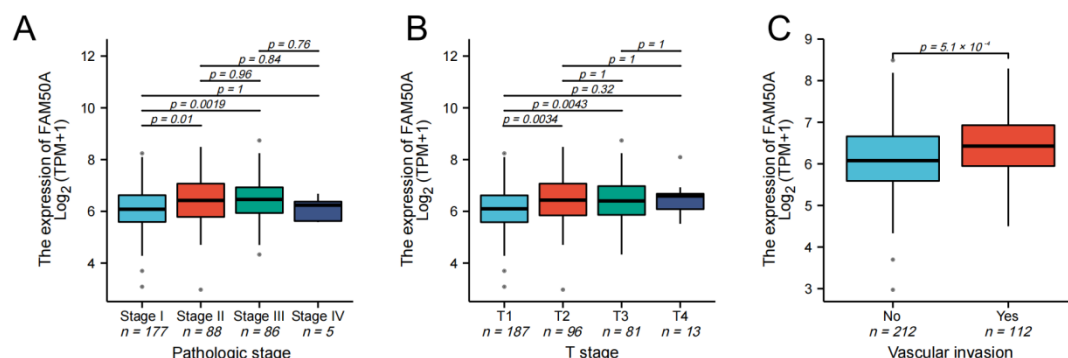

**Figure S1.** Different expression of FAM50A in various subtypes of HCC patients. (A) FAM50A expression in patients with different pathologic stages. (B) FAM50A expression in patients with different T stages. (C) FAM50A expression in patients with vascular invasion or not.

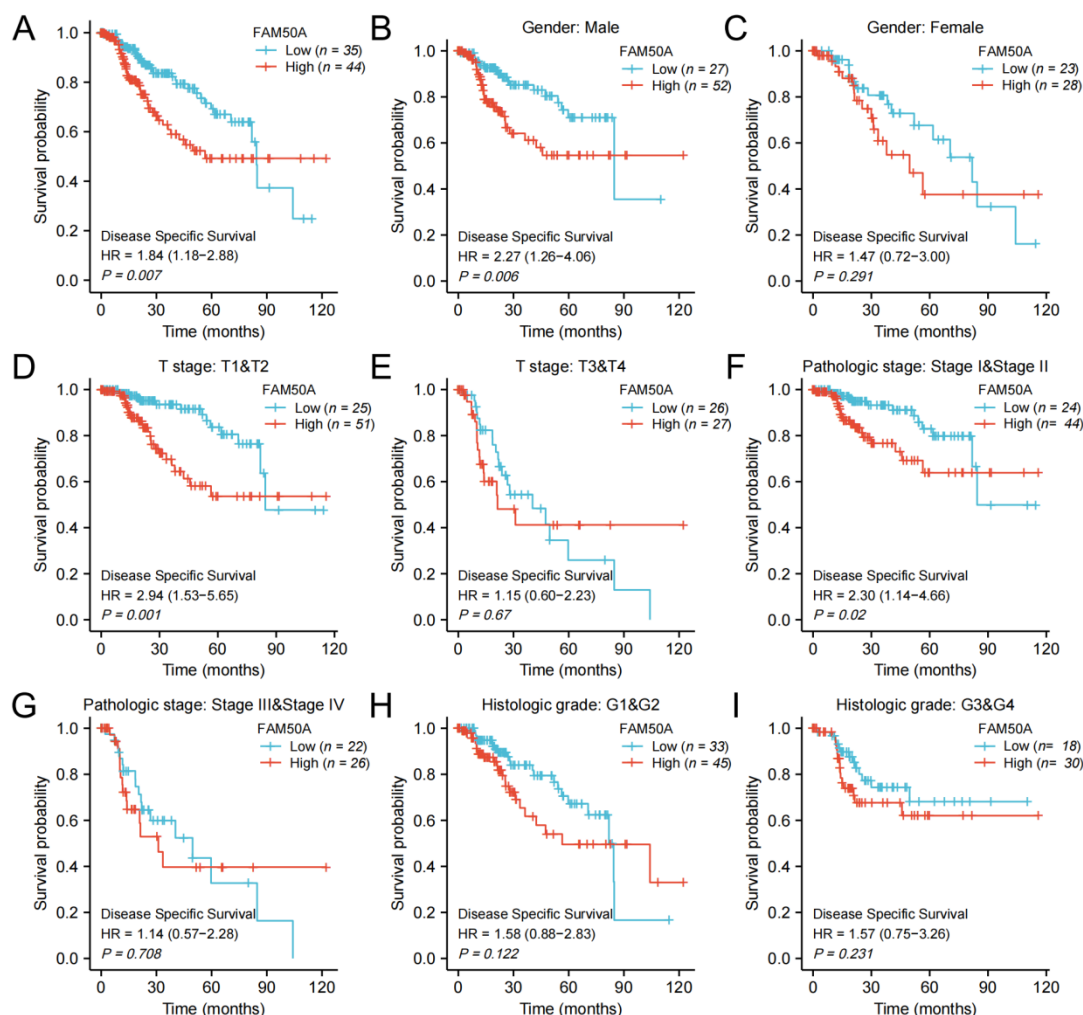

**Figure S2.** K-M survival analysis. We analyzed the effects of FAM50A on DSS in HCC patients with the help of information from TCGA. (A) All HCC patients. (B) Male patients. (C) Female patients. (D) T stage (T1 & T2). (E) T stage (T3 & T4). (F) Pathologic stage I&II. (G) Pathologic stage III&IV. (H) Histologic grade 1&2. (I) Histologic grade 3&4.

**Table S1.** Univariate and multivariate cox regression analysis of DSS in HCC patients induced by FAM50A.

| Characteristics                                             | HR (95% CI) Univariate analysis | P value | HR (95% CI) Multivariate analysis | P value |
|-------------------------------------------------------------|---------------------------------|---------|-----------------------------------|---------|
| Gender (Female vs. Male)                                    | 0.813 (0.516–1.281)             | 0.373   |                                   |         |
| Age (<=60 vs. >60)                                          | 0.846 (0.543–1.317)             | 0.458   |                                   |         |
| Pathologic stage (Stage I~II vs. III~IV)                    | 3.803 (2.342–6.176)             | <0.001  | 0.925 (0.093–9.199)               | 0.947   |
| Histologic grade (G1~2 vs. 3~4)                             | 1.086 (0.683–1.728)             | 0.726   |                                   |         |
| T stage (T1~2 vs. 3~4)                                      | 3.639 (2.328–5.688)             | <0.001  | 2.577 (0.250–26.556)              | 0.426   |
| N stage (N0 vs. N1)                                         | 3.612 (0.870–14.991)            | 0.077   |                                   |         |
| M stage (M0 vs. N1)                                         | 5.166 (1.246–21.430)            | 0.024   | 2.567 (0.454–14.511)              | 0.286   |
| Adjacent hepatic tissue inflammation (None vs. Mild~Severe) | 1.403 (0.768–2.566)             | 0.271   |                                   |         |
| Residual tumor (R0 vs. 1~2)                                 | 1.678 (0.728–3.870)             | 0.224   |                                   |         |
| Child-Pugh grade (A vs. B~C)                                | 2.560 (1.123–5.834)             | 0.025   | 3.671 (1.100–12.243)              | 0.034   |
| Vascular invasion (No vs. Yes)                              | 1.277 (0.707–2.306)             | 0.418   |                                   |         |
| AFP (ng/mL) (<=400 vs. >400)                                | 0.867 (0.450–1.668)             | 0.668   |                                   |         |
| Albumin (g/dL) (<3.5 vs. >=3.5)                             | 1.148 (0.586–2.250)             | 0.687   |                                   |         |
| Prothrombin time (<=4 vs. >4)                               | 1.778 (1.054–2.999)             | 0.031   | 1.734 (0.650–4.626)               | 0.272   |
| Fibrosis ishak score (0~1/2 vs. 3/4~5/6)                    | 0.660 (0.340–1.279)             | 0.218   |                                   |         |
| FAM50A (Low vs. High)                                       | 1.841 (1.178–2.878)             | 0.007   | 2.948 (1.257–6.910)               | 0.013   |

**Table S2.** Correlation between FAM50A and immune cell markers in HCC.

| Description    | Gene markers  | R    | p                     |
|----------------|---------------|------|-----------------------|
| Macrophage     | CD68          | 0.3  | $1.3 \times 10^{-12}$ |
|                | CD11b (ITGAM) | 0.3  | $8.8 \times 10^{-13}$ |
| CD4+ T cell    | AIM2          | 0.22 | $3 \times 10^{-7}$    |
|                | CCL4          | 0.13 | $2.4 \times 10^{-3}$  |
|                | CCNB1         | 0.48 | 0                     |
|                | EXO1          | 0.53 | 0                     |
|                | KIF11         | 0.45 | 0                     |
|                | KNTC1         | 0.36 | 0                     |
|                | NUF2          | 0.47 | 0                     |
|                | PRC1          | 0.48 | 0                     |
|                | RTKN2         | 0.31 | $1.4 \times 10^{-13}$ |
|                | CD8A          | 0.18 | $3.8 \times 10^{-5}$  |
| CD8+T cell     | CD8B          | 0.22 | $2.9 \times 10^{-7}$  |
| Dendritic cell | HLA-DPB1      | 0.29 | $1.4 \times 10^{-11}$ |
|                | HLA-DQB1      | 0.22 | $3.1 \times 10^{-7}$  |
|                | HLA-DRA       | 0.27 | $5.7 \times 10^{-10}$ |
|                | HLA-DPA1      | 0.25 | $1 \times 10^{-8}$    |
| B cell         | CD20(KRT20)   | 0.13 | $2 \times 10^{-3}$    |
| Neutrophils    | CD11b (ITGAM) | 0.3  | $8.8 \times 10^{-13}$ |
|                | CD15(FUT4)    | 0.19 | $1.4 \times 10^{-05}$ |
